# Supplementary material
Source: PubMed Central journal article supplement (PMC5876845)
Supplement: jamainternmed-178-494-s001.pdf [file jamainternmed-178-494-s001.pdf]

## Supplementary Online Content

Braithwaite D, Miglioretti DL, Zhu W, et al. Family history and breast cancer risk among older women in the Breast Cancer Surveillance Consortium Cohort. *JAMA Intern Med*. Published online February 12, 2018. doi:10.1001/jamainternmed.2017.8642

**eTable 1.** Distribution of women's sociodemographic and clinical factors by family history of breast cancer, Ages 65-74 (N = 294,375)\*

**eTable 2.** Distribution of family history of breast cancer and covariates by age, breast density and breast cancer risk factors, Ages 75+ (N = 177,485)

**eTable 3.** STROBE Statement—Checklist of items that should be included in reports of *cohort studies*

This supplementary material has been provided by the authors to give readers additional information about their work.

**eTable 1.** Distribution of women's sociodemographic and clinical factors by family history of breast cancer, Ages 65-74 (N = 294,375)\*

|                                                  | All           | No first-degree family history | Any first-degree family history | First-degree family history, relative diagnosis age <50 y | First-degree family history, relative diagnosis age ≥50 y |
|--------------------------------------------------|---------------|--------------------------------|---------------------------------|-----------------------------------------------------------|-----------------------------------------------------------|
| <b>BI-RADS density (N, %)</b>                    |               |                                |                                 |                                                           |                                                           |
| a: Almost entirely fat                           | 42807 (14.5)  | 36627 (14.7)                   | 6180 (13.8)                     | 1212 (13.3)                                               | 2505 (13.4)                                               |
| b: Scattered fibroglandular                      | 156008 (52.9) | 132536 (53)                    | 23472 (52.3)                    | 4736 (51.9)                                               | 9536 (51)                                                 |
| c & d: Heterogeneously dense & extremely dense   | 95920 (32.6)  | 80712 (32.3)                   | 15208 (33.9)                    | 3180 (34.9)                                               | 6658 (35.6)                                               |
| <b>Race/ethnicity (N, %)</b>                     |               |                                |                                 |                                                           |                                                           |
| White, non-Hispanic                              | 208729 (70.8) | 174467 (69.8)                  | 34262 (76.4)                    | 7018 (76.9)                                               | 15019 (80.3)                                              |
| Black, non-Hispanic                              | 17009 (5.8)   | 14896 (6)                      | 2113 (4.7)                      | 397 (4.3)                                                 | 633 (3.4)                                                 |
| Asian                                            | 15946 (5.4)   | 14544 (5.8)                    | 1402 (3.1)                      | 435 (4.8)                                                 | 762 (4.1)                                                 |
| Hispanic                                         | 20096 (6.8)   | 17594 (7)                      | 2502 (5.6)                      | 706 (7.7)                                                 | 978 (5.2)                                                 |
| Other or mixed                                   | 3017 (1)      | 2549 (1)                       | 468 (1)                         | 152 (1.7)                                                 | 231 (1.2)                                                 |
| Unknown                                          | 29938 (10.2)  | 25825 (10.3)                   | 4113 (9.2)                      | 420 (4.6)                                                 | 1076 (5.8)                                                |
| <b>Benign breast disease (N, %)</b>              |               |                                |                                 |                                                           |                                                           |
| None (no prior biopsy)                           | 233202 (79.1) | 200044 (80.1)                  | 33158 (73.9)                    | 6619 (72.5)                                               | 13787 (73.7)                                              |
| Prior biopsy, unknown dx                         | 50940 (17.3)  | 41236 (16.5)                   | 9704 (21.6)                     | 2020 (22.1)                                               | 3916 (20.9)                                               |
| Non-proliferative                                | 6776 (2.3)    | 5538 (2.2)                     | 1238 (2.8)                      | 276 (3)                                                   | 638 (3.4)                                                 |
| Proliferative without atypia                     | 2967 (1)      | 2393 (1)                       | 574 (1.3)                       | 161 (1.8)                                                 | 270 (1.4)                                                 |
| Proliferative with atypia                        | 674 (0.2)     | 534 (0.2)                      | 140 (0.3)                       | 37 (0.4)                                                  | 68 (0.4)                                                  |
| LCIS                                             | 176 (0.1)     | 130 (0.1)                      | 46 (0.1)                        | 15 (0.2)                                                  | 20 (0.1)                                                  |
| <b>Postmenopausal hormone therapy use (N, %)</b> |               |                                |                                 |                                                           |                                                           |
| No                                               | 186477 (63.3) | 157627 (63.1)                  | 28850 (64.3)                    | 6059 (66.4)                                               | 12545 (67.1)                                              |
| Yes                                              | 65664 (22.3)  | 56090 (22.4)                   | 9574 (21.3)                     | 1772 (19.4)                                               | 3703 (19.8)                                               |
| Unknown                                          | 42594 (14.5)  | 36158 (14.5)                   | 6436 (14.3)                     | 1297 (14.2)                                               | 2451 (13.1)                                               |
| <b>Body mass index (N, %)</b>                    |               |                                |                                 |                                                           |                                                           |
| <18.5                                            | 2461 (1.7)    | 2064 (1.7)                     | 397 (1.7)                       | 87 (1.5)                                                  | 176 (1.5)                                                 |
| [18.5,25)                                        | 56655 (39.6)  | 47408 (39.7)                   | 9247 (39)                       | 2103 (35.4)                                               | 4490 (39.1)                                               |
| [25,30)                                          | 47802 (33.4)  | 39861 (33.4)                   | 7941 (33.5)                     | 2093 (35.2)                                               | 3723 (32.4)                                               |
| [30,35)                                          | 23306 (16.3)  | 19455 (16.3)                   | 3851 (16.2)                     | 1006 (16.9)                                               | 1915 (16.7)                                               |
| ≥35                                              | 12894 (9)     | 10601 (8.9)                    | 2293 (9.7)                      | 652 (11)                                                  | 1191 (10.4)                                               |

\* BI-RADS density= Breast Imaging Reporting and Data System density; some columns do not add to 100% due to rounding

**eTable 2.** Distribution of family history of breast cancer and covariates by age, breast density and breast cancer risk factors, Ages 75+ (N = 177,485)\*

|                                                  | All           | No first-degree family history | Any first-degree family history | First-degree family history, relative diagnosis age <50 y | First-degree family history, relative diagnosis age ≥50 y |
|--------------------------------------------------|---------------|--------------------------------|---------------------------------|-----------------------------------------------------------|-----------------------------------------------------------|
| <b>BI-RADS density (N, %)</b>                    |               |                                |                                 |                                                           |                                                           |
| a: Almost entirely fat                           | 27315 (15.4)  | 22839 (15.5)                   | 4476 (14.8)                     | 935 (14.9)                                                | 1771 (14.2)                                               |
| b: Scattered fibroglandular                      | 96259 (54.2)  | 80026 (54.4)                   | 16233 (53.5)                    | 3332 (53.2)                                               | 6545 (52.3)                                               |
| c & d: Heterogeneously dense & extremely dense   | 53911 (30.4)  | 44300 (30.1)                   | 9611 (31.7)                     | 1993 (31.8)                                               | 4193 (33.5)                                               |
| <b>Race/ethnicity (N, %)</b>                     |               |                                |                                 |                                                           |                                                           |
| White, non-Hispanic                              | 127005 (71.6) | 103614 (70.4)                  | 23391 (77.1)                    | 4958 (79.2)                                               | 10043 (80.3)                                              |
| Black, non-Hispanic                              | 9258 (5.2)    | 8109 (5.5)                     | 1149 (3.8)                      | 224 (3.6)                                                 | 358 (2.9)                                                 |
| Asian                                            | 7643 (4.3)    | 6785 (4.6)                     | 858 (2.8)                       | 282 (4.5)                                                 | 457 (3.7)                                                 |
| Hispanic                                         | 9204 (5.2)    | 7984 (5.4)                     | 1220 (4)                        | 332 (5.3)                                                 | 505 (4)                                                   |
| Other or mixed                                   | 1255 (0.7)    | 1040 (0.7)                     | 215 (0.7)                       | 71 (1.1)                                                  | 107 (0.9)                                                 |
| Unknown                                          | 23120 (13)    | 19633 (13.3)                   | 3487 (11.5)                     | 393 (6.3)                                                 | 1039 (8.3)                                                |
| <b>Benign breast disease (N, %)</b>              |               |                                |                                 |                                                           |                                                           |
| None (no prior biopsy)                           | 141260 (79.6) | 118666 (80.6)                  | 22594 (74.5)                    | 4557 (72.8)                                               | 9238 (73.9)                                               |
| Prior biopsy, unknown dx                         | 30600 (17.2)  | 24069 (16.4)                   | 6531 (21.5)                     | 1379 (22)                                                 | 2723 (21.8)                                               |
| Non-proliferative                                | 3553 (2)      | 2844 (1.9)                     | 709 (2.3)                       | 197 (3.1)                                                 | 318 (2.5)                                                 |
| Proliferative without atypia                     | 1631 (0.9)    | 1251 (0.9)                     | 380 (1.3)                       | 99 (1.6)                                                  | 178 (1.4)                                                 |
| Proliferative with atypia                        | 340 (0.2)     | 264 (0.2)                      | 76 (0.3)                        | 21 (0.3)                                                  | 37 (0.3)                                                  |
| LCIS                                             | 101 (0.1)     | 71 (0)                         | 30 (0.1)                        | 7 (0.1)                                                   | 15 (0.1)                                                  |
| <b>Postmenopausal hormone therapy use (N, %)</b> |               |                                |                                 |                                                           |                                                           |
| No                                               | 125479 (70.7) | 104105 (70.7)                  | 21374 (70.5)                    | 4519 (72.2)                                               | 8885 (71)                                                 |
| Yes                                              | 26701 (15)    | 22097 (15)                     | 4604 (15.2)                     | 857 (13.7)                                                | 1947 (15.6)                                               |
| Unknown                                          | 25305 (14.3)  | 20963 (14.2)                   | 4342 (14.3)                     | 884 (14.1)                                                | 1677 (13.4)                                               |
| <b>Body mass index (N, %)</b>                    |               |                                |                                 |                                                           |                                                           |
| <18.5                                            | 2277 (2.9)    | 1901 (3)                       | 376 (2.5)                       | 77 (2)                                                    | 172 (2.4)                                                 |
| [18.5,25)                                        | 35516 (45.2)  | 28811 (45.3)                   | 6705 (44.9)                     | 1611 (42.2)                                               | 3143 (44)                                                 |
| [25,30)                                          | 26103 (33.2)  | 21178 (33.3)                   | 4925 (33)                       | 1296 (34)                                                 | 2362 (33.1)                                               |
| [30,35)                                          | 10710 (13.6)  | 8575 (13.5)                    | 2135 (14.3)                     | 602 (15.8)                                                | 1053 (14.7)                                               |
| ≥35                                              | 3990 (5.1)    | 3193 (5)                       | 797 (5.3)                       | 230 (6)                                                   | 415 (5.8)                                                 |

\* BI-RADS density= Breast Imaging Reporting and Data System density; some columns do not add to 100% due to rounding

**eTable 3.** STROBE Statement—Checklist of items that should be included in reports of *cohort studies*

|                           | Item No | Recommendation                                                                                                                                                                                    | Page(s) |
|---------------------------|---------|---------------------------------------------------------------------------------------------------------------------------------------------------------------------------------------------------|---------|
| <b>Title and abstract</b> | 1       | (a) Indicate the study's design with a commonly used term in the title or the abstract                                                                                                            | 1       |
|                           |         | (b) Provide in the abstract an informative and balanced summary of what was done and what was found                                                                                               | 3       |
| <b>Introduction</b>       |         |                                                                                                                                                                                                   |         |
| Background/rationale      | 2       | Explain the scientific background and rationale for the investigation being reported                                                                                                              | 4       |
| Objectives                | 3       | State specific objectives, including any prespecified hypotheses                                                                                                                                  | 4-5     |
| <b>Methods</b>            |         |                                                                                                                                                                                                   |         |
| Study design              | 4       | Present key elements of study design early in the paper                                                                                                                                           | 5       |
| Setting                   | 5       | Describe the setting, locations, and relevant dates, including periods of recruitment, exposure, follow-up, and data collection                                                                   | 5-6     |
| Participants              | 6       | (a) Give the eligibility criteria, and the sources and methods of selection of participants. Describe methods of follow-up                                                                        | 4       |
|                           |         | (b) For matched studies, give matching criteria and number of exposed and unexposed                                                                                                               |         |
| Variables                 | 7       | Clearly define all outcomes, exposures, predictors, potential confounders, and effect modifiers. Give diagnostic criteria, if applicable                                                          | 4-5     |
| Data sources/measurement  | 8*      | For each variable of interest, give sources of data and details of methods of assessment (measurement). Describe comparability of assessment methods if there is more than one group              | 4-5     |
| Bias                      | 9       | Describe any efforts to address potential sources of bias                                                                                                                                         | 6-7     |
| Study size                | 10      | Explain how the study size was arrived at                                                                                                                                                         | 5       |
| Quantitative variables    | 11      | Explain how quantitative variables were handled in the analyses. If applicable, describe which groupings were chosen and why                                                                      | 5-6     |
| Statistical methods       | 12      | (a) Describe all statistical methods, including those used to control for confounding                                                                                                             | 6-7     |
|                           |         | (b) Describe any methods used to examine subgroups and interactions                                                                                                                               | 6-7     |
|                           |         | (c) Explain how missing data were addressed                                                                                                                                                       | N/A     |
|                           |         | (d) If applicable, explain how loss to follow-up was addressed                                                                                                                                    | N/A     |
|                           |         | (e) Describe any sensitivity analyses                                                                                                                                                             | 7       |
| <b>Results</b>            |         |                                                                                                                                                                                                   |         |
| Participants              | 13*     | (a) Report numbers of individuals at each stage of study—eg numbers potentially eligible, examined for eligibility, confirmed eligible, included in the study, completing follow-up, and analysed | 7-8     |
|                           |         | (b) Give reasons for non-participation at each stage                                                                                                                                              | 5       |
|                           |         | (c) Consider use of a flow diagram                                                                                                                                                                | N/A     |

|                          |     |                                                                                                                                                                                                              |       |
|--------------------------|-----|--------------------------------------------------------------------------------------------------------------------------------------------------------------------------------------------------------------|-------|
| Descriptive data         | 14* | (a) Give characteristics of study participants (eg demographic, clinical, social) and information on exposures and potential confounders                                                                     | 8     |
|                          |     | (b) Indicate number of participants with missing data for each variable of interest                                                                                                                          | 8     |
|                          |     | (c) Summarise follow-up time (eg, average and total amount)                                                                                                                                                  | 7     |
| Outcome data             | 15* | Report numbers of outcome events or summary measures over time                                                                                                                                               | 7     |
| Main results             | 16  | (a) Give unadjusted estimates and, if applicable, confounder-adjusted estimates and their precision (eg, 95% confidence interval). Make clear which confounders were adjusted for and why they were included | 8-9   |
|                          |     | (b) Report category boundaries when continuous variables were categorized                                                                                                                                    | 8-9   |
|                          |     | (c) If relevant, consider translating estimates of relative risk into absolute risk for a meaningful time period                                                                                             | 8-9   |
| Other analyses           | 17  | Report other analyses done—eg analyses of subgroups and interactions, and sensitivity analyses                                                                                                               | 8-9   |
| <b>Discussion</b>        |     |                                                                                                                                                                                                              |       |
| Key results              | 18  | Summarise key results with reference to study objectives                                                                                                                                                     | 9-10  |
| Limitations              | 19  | Discuss limitations of the study, taking into account sources of potential bias or imprecision. Discuss both direction and magnitude of any potential bias                                                   | 11    |
| Interpretation           | 20  | Give a cautious overall interpretation of results considering objectives, limitations, multiplicity of analyses, results from similar studies, and other relevant evidence                                   | 10-11 |
| Generalisability         | 21  | Discuss the generalisability (external validity) of the study results                                                                                                                                        | 11    |
| <b>Other information</b> |     |                                                                                                                                                                                                              |       |
| Funding                  | 22  | Give the source of funding and the role of the funders for the present study and, if applicable, for the original study on which the present article is based                                                | 13    |
